# Supplementary material
Source: publisher figshare collection journal article supplement (https://sage.figshare.com/ndownloader/files/22068168)

**Supplemental material, for 'Relationship between remission, disease activity and patient-reported outcome measures in patients with recent-onset systemic lupus erythematosus' by Rebecca Heijke, Mathilda Björk, Martina Frodlund, Laura McDonald, Evo Alemao and Christopher Sjöwall**

**Definition of on/off therapy:**

Off therapy: No immunomodulatory treatment other than antimalarials.

On therapy: Stable immunosuppressives, including biologics, and prednisolone up to 5 mg daily allowed.

**Supplementary Table 1** Patient characteristics at baseline (unless otherwise specified)

Data are presented as n (%) unless otherwise stated.

ACR: American College of Rheumatology; IF-ANA: immunofluorescence microscopy antinuclear antibodies; SLICC: Systemic Lupus International Collaborating Clinics.

| Included patients                                              | N = 41     |
|----------------------------------------------------------------|------------|
|                                                                |            |
| <i>Background variables</i>                                    |            |
| Sex, female                                                    | 33 (80.5)  |
| Age at inclusion, years, median (range)                        | 39 (18–77) |
| White                                                          | 35 (85.4)  |
| Previous or current tobacco smoking                            | 18 (43.9)  |
| Meeting the 1982 ACR classification                            | 36 (87.8)  |
| Meeting the 2012 SLICC classification                          | 41 (100.0) |
| Number of fulfilled ACR criteria, mean (range)                 | 4.7 (3–9)  |
| Meeting DORIS criteria                                         |            |
| 1A                                                             | 12 (29.3)  |
| 1B                                                             | 8 (19.5)   |
| 2A                                                             | 12 (29.3)  |
| 2B                                                             | 8 (19.5)   |
| SLICC/ACR damage index at last follow-up (score), mean (range) | 0.49 (0–2) |
| No organ damage at last follow-up                              | 25 (61.0)  |
|                                                                |            |
| <i>Clinical phenotypes (1982 ACR definitions)</i>              |            |
| 1) Malar rash                                                  | 12 (29.3)  |
| 2) Discoid rash                                                | 4 (9.8)    |
| 3) Photosensitivity                                            | 20 (48.8)  |
| 4) Oral ulcers                                                 | 7 (17.1)   |
| 5) Arthritis                                                   | 29 (70.7)  |
| 6) Serositis                                                   | 11 (26.8)  |
| 7) Renal disorder                                              | 15 (36.6)  |
| 8) Neurologic disorder                                         | 3 (7.3)    |
| 9) Hematologic disorder                                        | 27 (65.9)  |
| 10) Immunologic disorder                                       | 24 (58.5)  |
| 11) IF-ANA                                                     | 41 (100.0) |
|                                                                |            |
| <i>Other characteristics</i>                                   |            |
| Prescribed antihypertensives                                   | 19 (46.3)  |
| Prescribed antidepressants                                     | 4 (9.8)    |

|                                                                                                    |               |
|----------------------------------------------------------------------------------------------------|---------------|
| Raynaud's phenomenon                                                                               | 11 (26.8)     |
| Estimated glomerular filtration rate at last follow-up (mL/min/1.73 m <sup>2</sup> ), mean (range) | 98.6 (29–171) |

### Supplementary Figure 1 Mean scores over time

Scores shown are for A) SLEDAI-2K, B) EQ-5D, C) VAS pain, D) VAS fatigue, E) VAS well-being. Data are mean (standard deviation). Pain, fatigue and well-being: VAS ranging from 0–100, with higher scores indicating greater severity.

EQ-5D: EuroQoL-5 Dimensions; SLE: systemic lupus erythematosus; SLEDAI-2K: SLE Disease Activity Index-2000; VAS: visual analogue scale.

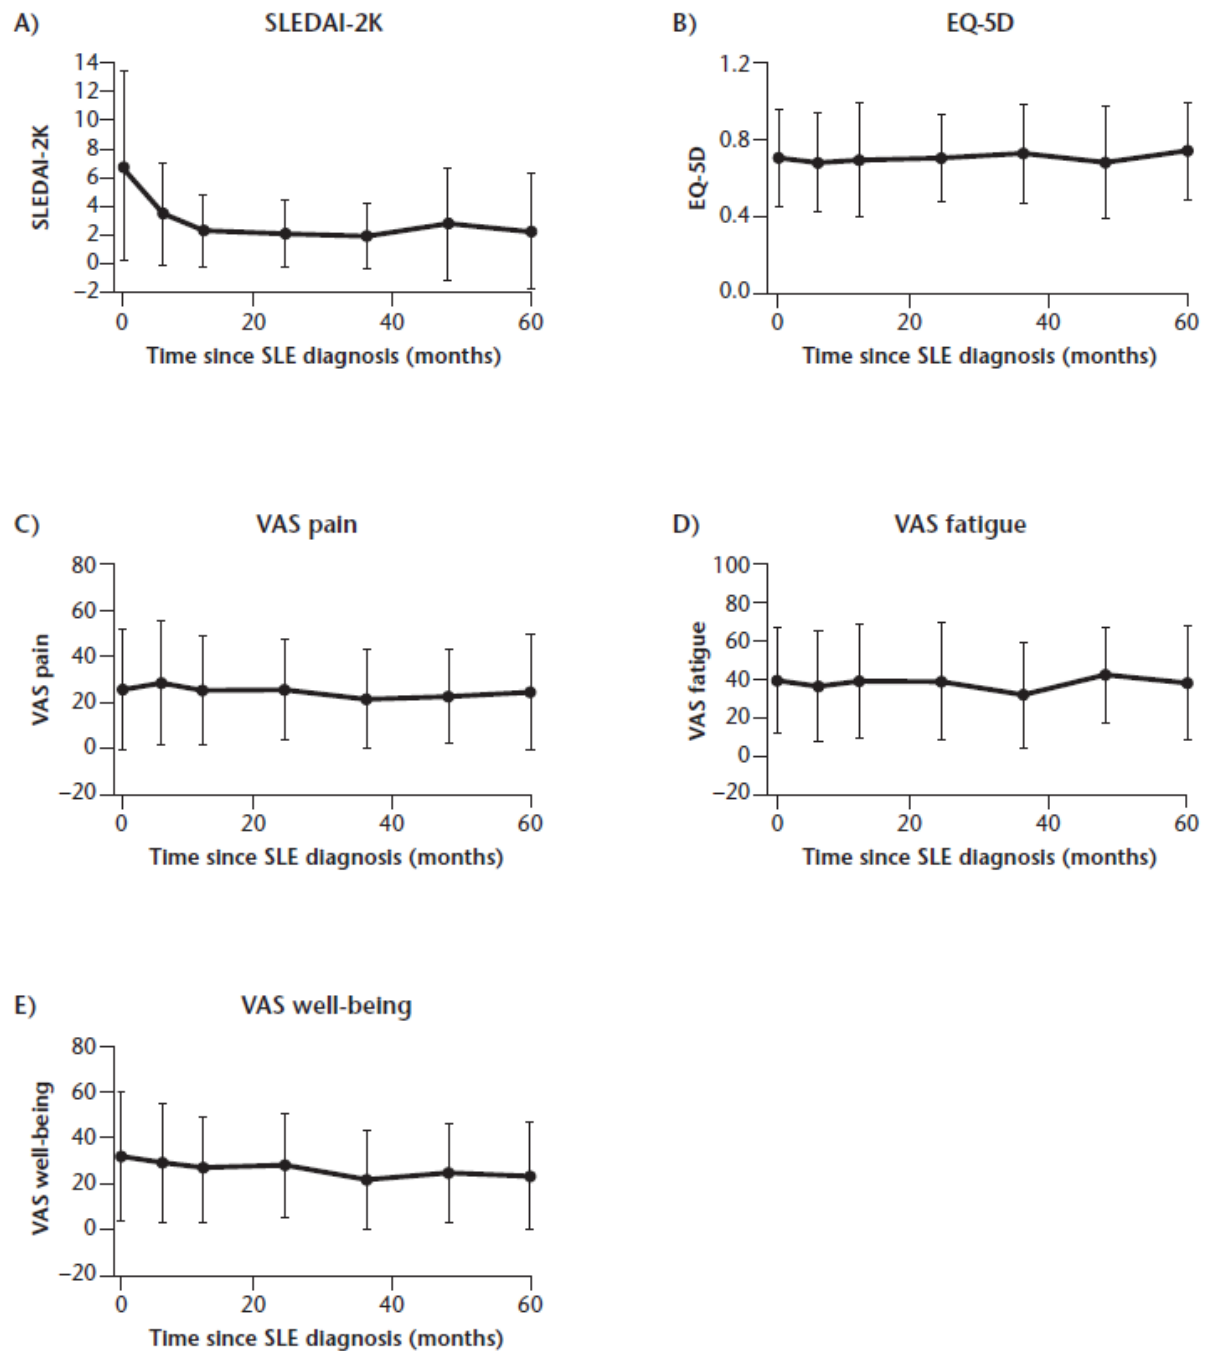

Supplement: Supplementary file [file 22068168]
